# Supplementary material for: Spatio-temporal dynamics of the liver shapes hepatocytes heterogeneity and impacts in vivo gene transfer and editing
Source: Research Square preprint supplement (doi:10.21203/rs.3.rs-3138832/v1), 2023-07-28
Supplement: Supplementary file 1 [file 7b1120ceaa8e96a579a4b4f6.xlsx]

## Sheet: Extended Data Table 1
Gene
Acadm
Asl
Cebpa
Cldn1
Cldn2
Dnajc22
Efna1
Eps8l3
Esrp2
Fgl1
Gfer
Gprc5c
Hnf1a
Hnf4a
Hp
Lsr
Met
Pck1
Pcsk9
Prkcsh
Proc
Rab17
Rhbdd3
Rnf128
Sdc1
Serpina5
Sod2
Tbx3
Tmem37
Ugt1a6b
Ugt1a9
Upb1
Xbp1
Zmpste24
