# Supplementary material for: Spatio-temporal dynamics of the liver shapes hepatocytes heterogeneity and impacts in vivo gene transfer and editing
Source: Research Square preprint supplement (doi:10.21203/rs.3.rs-3138832/v1), 2023-07-28
Supplement: Supplementary file 2 [file 91129c60f9dcd5e7f1245722.docx]

**Spatio-temporal dynamics of the liver shapes hepatocytes heterogeneity**

**and impacts *in vivo* gene transfer and editing**

Francesco Starinieri1,*, Michela Milani 1,*, Stefano Beretta1, Cesare Canepari1, Anna Fabiano1, Chiara Simoni1,2, Eugenia Cammarota3, Monica Volpin1, Giulia Bortolussi4, Fabio Russo1, Mauro Biffi1, Andrés F. Muro4, Eugenio Montini1, Federica Moalli3, Matteo Iannacone3, Ivan Merelli5, Alessio Cantore1,2

1San Raffaele Telethon Institute for Gene Therapy, IRCCS San Raffaele Scientific Institute, Milan, Italy

2Vita Salute San Raffaele University, Milan, Italy

3IRCCS San Raffaele Scientific Institute, Milan, Italy

4ICGEB, Trieste, Italy

5Institute for Biomedical Technologies, National Research Council, Milan, Italy.

*Equal contribution

Corresponding Author:

Alessio Cantore, San Raffaele Telethon Institute for Gene Therapy, IRCCS San Raffaele Scientific Institute, Via Olgettina 60, 20135, Milan, Italy. Email: [cantore.alessio@hsr.it](mailto:cantore.alessio@hsr.it)

**Extended Data Figure 1. Differences in gene transfer efficiency among ages are LV integration-, pseudotype-, and promoter-independent.** **(A)** Mean and SEM of liver weight in mice with different body weight analyzed during post-natal growth. W1 n=4, W2 n=4, W3 n=4, W6 n=5, W7 n=3, W12 n=5. **(B)** Single values and median of percentage of liver transgene-positive tissue area measured 7 days post i.v. administration of VSV.G-pseudotyped IDLV (2.5x1010 TU/Kg) expressing mCherry under ET promoter in mice treated at the indicated age. Kruskal-Wallis test with Dunn’s multiple comparisons test. D1 n=5, W2 n=5, W8 n=5. **(C)** Single values and median of liver transgene-positive tissue area measured 7 days post i.v. administration of a GP64-pseudotyped LV (2.5x1010 TU/Kg) expressing mCherry under ET promoter in mice treated at the indicated age. Kruskal-Wallis test with Dunn’s multiple comparisons test. D1 n=5, W2 n=6, W8 n=5. **(D)** Single values and median of percentage of liver transgene-positive tissue area measured 7 days post i.v. administration of a VSV.G-pseudotyped LV (2.5x1010 TU/Kg) expressing GFP under HCR-hAAT promoter in mice treated at the indicated age. Kruskal-Wallis test with Dunn’s multiple comparisons test. D1 n=5, W2 n=7, W8 n=5. **(E)** Mean and SEM of hFIX measured 12 weeks post treatment in plasma of mice treated at the indicated age by i.v. administration of the indicated doses of VSV.G-pseudotyped LV expressing hFIX under the control of ET promoter. 2.5x1010 TU/Kg: D1 n=14, W2 n=12, W8 n=15; 4.25x1010 TU/Kg: D1 n=7, W2 n=4; 8.5x1010 TU/Kg: D1 n=6, W2 n=3, W8 n=5. **(F)** Single values and median of percentage of fenestrated area in LSEC of mice analyzed at D1, W2 or W7 of age by scanning electron microscopy (EM). Scale bar 1 µm. Kruskal-Wallis test with Dunn’s multiple comparisons test. D1 n=7, W2 n=8, W7 n=9. **(G)** Representative EM images of LSEC of mice at D1, W2 or W7 of age. Arrows indicate discontinued endothelium.

**Extended Data Figure 2. *In vivo* LV administration results in higher transduction of PC hepatocytes in young mice and PP hepatocytes in adult mice. (A)** Scheme of the experiment shown in Fig. 2A, to evaluate transduction of different subsets of hepatocytes in mice treated at different ages. Control mice were treated with a mix of 2 LV expressing different fluorescent reporters (GFP or mCherry, 2.5x1010 TU/Kg each LV) at D1, W2 or W8, to determine the basal level of co-transduction at each age. Two groups of mice were treated with a single dose of 2.5x1010 TU/Kg of LV expressing GFP when newborns, and a second dose of LV expressing mCherry when they reached 2 or 8 weeks of age. Analysis has been performed at W3 or W9 of age. **(B-C)** Single values and mean of IgM (B) or IgG (C) measured in serum of mice treated with LV at D1 or W8 and analyzed at 3, 14 or 63 days after administration. D1 n=4, W8 n=3. **(D)** Single values and median of liver tissue area positive for GFP, mCherry, or both fluorophores in mice of Fig. 2A. **(E)** Single values and median of liver transgene-positive tissue area in PC or PP area of mice in Fig. 2D. **(F-G)** Mean of percentage of transgene-positive tissue area measured according to the distance from GS-positive (F) or CK7-positive (G) cells with a step of 5 µm. D1 n=11, W2 n=11, W8 n=11. **(H)** Single values and median of liver transgene-positive tissue area in PC or PP area of mice in Fig. 2D. **(I)** Single values and median of liver transgene-positive tissue area in PC or PP area of mice in Fig. 2E. **(J)** Single values and median of liver transgene-positive tissue area expressed as fold between the percentage of transduced PP and PC area analyzed at the indicated week post i.v. administration of LV (2.5x1010 TU/kg) expressing GFP in mice treated at D1, W2 or W8, measured by immunohistochemistry (IHC) analysis. 1 week: D1 n=5, W2 n=4, W8 n=5; 3 weeks: D1 n=5; 4 weeks: W2 n=3; 6 weeks: D1 n=4; 12 weeks: D1 n=3, W8 n=5; 26 weeks: W8 n=2; 52 weeks: W8 n=2. **(K)** Single values and median of percentage of F4/80-positive tissue area measured by IF analysis in *Clec4f-DTR* mice, treated or not with DT 12h before the analysis. DT- n=2; DT+ n=2. **(L)** Single values and median of liver transgene-positive tissue area in PC or PP area of mice in Fig. 2G.

**Extended Data Figure 3. Hepatocyte proliferation rate is progressively reduced during growth. (A)** Single values and median of percentage of Confetti-positive and LV-positive clusters made of 1-2 cells (same as in Fig. 3C and 3F). Mann-Whitney test. **(B)** Single values and median of average size of clusters marked by one Confetti fluorescent reporter or by BFP expressed by LV administered to mice when 2-week-old, and analyzed at W3, W6, W8 or Y1. W3 Confetti n=8, LV n=4; W6 Confetti n=7; W8 Confetti n=11, LV n=3; Y1 Confetti n=11, LV n=4. **(C)** Single values and median of percentage of Confetti-positive or LV-positive area constituted by clusters with >2 cells of mice in (B). **(D)** Mean and SEM of percentage of Confetti-positive clusters made of 1-2, 3-5, 6-10 or >10 cells of mice in (B). **(E)** Mean and SEM of percentage of LV-positive clusters made of 1-2, 3-5, 6-10 or >10 cells of mice in (B). **(F)** Single values and median of average size of clusters marked by one Confetti fluorescent reporter or by BFP expressed by LV administered to mice when 8-week-old, and analyzed at W9, W14 or Y1. W9 Confetti n=2, LV n=2; W14 Confetti n=8, LV n=8; Y1 Confetti n=8, LV n=3. **(G)** Single values and median of percentage of Confetti-positive or LV-positive area constituted by clusters with >2 cells of mice in (F). **(H)** Mean and SEM of percentage of Confetti-positive clusters made of 1-2, 3-5, 6-10 or >10 cells of mice in (F). **(I)** Mean and SEM of percentage of LV-positive clusters made of 1-2, 3-5, 6-10 or >10 cells of mice in (F).

**Extended Data Figure 4. LV IS analysis shows absence of genotoxicity of LV administered to young and adult mice. (A)** Volcano plot of the common IS (CIS) analysis, performed on the IS identified across samples of mice treated at D1, W2 or W8 and analyzed >8 months post LV administration. D1 n= 19, W2 n= 17, W8 n=13. All genes targeted by IS were tested with size proportional to the gene length and plotted as dots; gene integration frequency normalized by gene length was placed on the x axis, while the y axis shows the p value of the CIS Grubbs test for outliers (–log10 of p value). Tumor suppressor genes are annotated in blue, protooncogenes in red, and a generic “other” in green for the remaining genes. Dots with significant p values (α threshold of 0.05) are above the dashed horizontal line. **(B)** Stacked bar plot representation of the clonal abundance of mice in (A). The height of each segment shows the relative percentage of genomes of a specific IS over the total genomes. Note that no clone shows relative abundance >= 0.1%. On top of each bar the total number of retrieved IS is shown. The list at the bottom of the graph indicates the top 10 most abundant genes.

**Extended Data Figure 5. Most of the hepatocytes inside a cluster of clonal origin proliferate contributing to the increase of cluster size. (A)** Scheme of the experiment: CreERT2-expressing LV is administered i.v. (2.5x1010TU/Kg) to newborn *R26-Confetti* mice. In the first 2 weeks of life, transduced hepatocytes proliferate, generating a cluster of CreERT2-expressing hepatocytes. When they reach 2 weeks of age, 3 doses of Tamoxifen are administered intraperitoneally to activate recombination of Confetti locus. Each cell of CreERT2-expressing cluster will be marked with a different fluorophore. Analysis is performed when mice reach 6 weeks of age. Between week 2 and week 6 marked hepatocytes proliferate, generating single-color clusters inside a larger CreERT2-expressing cluster, which size is determined by clonal proliferation of a single hepatocyte that was transduced in the newborn liver. **(B)** Representative images of the liver of mice treated according to the experimental scheme shown in (A). Upper panel: liver collected 1 week post tamoxifen administration (3 weeks of age). Central and lower panel: livers collected 4 weeks post tamoxifen administration (6 weeks of age). Scale bar 100 µm. **(C)** Representative image of liver of a mouse shown in Fig. 3G-I analyzed at W3. Blue: Hoechst; white: HNF4α; green: EdU; red: mCherry. Scale bar 50 µm.

**Extended Data Figure 6. Zonated hepatocytes transcriptomic profile is established over time. (A)** UMAP of liver spots of mice of all groups colored according to age. **(B)** Representative images of hematoxylin & eosin (H&E) staining of liver of newborn (#5), 2-week-old (#7) or adult mice (#13), and mapping of spots labeled as belonging to layers 1-4 (PC, orange) or 5-8 (PP, blue) on corresponding slices. On the right, mapping of spots on all liver samples. **(C)** UMAP of liver spots of newborns (left panel) or 2-week-old (right panel) mice colored according to unsupervised clustering. **(D)** Representative images of livers of newborn (left panel) and adult (right panel) liver sections stained with E-cadherin antibody. Scale bar 100 µm. **(E)** UMAP of liver spots of mice of all groups colored according to the transcriptional profile of layers 1-8 from Halpern *et al*. and pseudotime analysis. **(F)** UMAP of liver spots of newborns, 2-week-old or adult mice showing expression of proteasome pathway. **(G)** Single values and median of liver transgene-positive tissue area in PC and PP area of mice in Fig. 4E,F.

**Extended Data Figure 7. LV transduction minimally impacts on liver transcriptomic profile. (A)** UMAP of liver spots of newborns, 2-week-old or adult mice showing expression of LV transgene. **(B)** Heatmap of relative expression (fold to highest expressed gene) in layers 1-8 of genes upregulated (left panel, log2FC>0) or downregulated (right panel, log2FC<0) in LV-positive vs. LV-negative spots of adult mice. **(C)** Venn diagrams with number of genes upregulated (upper panel) or downregulated (lower panel) in LV-positive vs. LV-negative spots in newborn, 2-week-old and adult mice. **(D-E)** Bar plot of enriched pathways (adjusted p<0.001) on DEG upregulated in LV-treated vs- LV-untreated mice (D) or in LV-positive vs- LV-negative mice (E). Counts on the X axis represent the number of enriched genes in the corresponding term, while bar colors represent the statistical significance (p-value).

**Extended Data Figure 8. Gene enriched in HDR-positive hepatocytes are involved in liver development. (A)** Scheme of the experiment shown in Fig. 5. Newborn mice are treated with 2 AAV vectors (4.5x1011 vg/mouse each), one coding for *Staphylococcus aureus* Cas9 and gRNA targeting the stop codon of albumin gene, the other carrying donor DNA with homology arm to mediate integration of P2A.mCherry transgene in frame with the last coding exon of albumin gene. **(B)** Single values and median of transgene-positive liver tissue area expressed as fold between the percentage of transgene-positive PP and PC area of mice treated with the 2 AAV shown in (A) or in newborn LV-transduced mice (same data of Fig 2C, shown here for comparison). One-sample Wilcoxon signed-rank test vs. 1. HDR n=12, LV n=11. **(C)** Comparison of mean and SEM of percentage of Confetti-positive (same data of Fig. S3A), LV-positive (same data of Fig. S3A) or HDR-positive (same data in Fig. 5D) clusters made of 1-2 cells. **(D)** Bar plot of enriched Gene Ontology (GO) biological processes (adjusted p<0.01) on DEG upregulated in CherryPos hepatocytes of experiment shown in Fig. 5E,F. **(E)** UMAP of liver spots of newborns, 2-week-old or adult mice showing expression of HSPC signature.

**Extended Data Table 1**

List of genes present in the signature “CherryPos” hepatocytes (see Fig. 5G)

**Supplementary Video 1**

Three-dimensional rendering of two-photon microscopy of cleared livers from mice treated as newborns with LV expressing GFP under ET promoter (2.5x1010 TU/kg) analyzed at the indicated time after LV administration.
